# Supplementary material for: Waste to wealth: spent catalyst as an efficient and stable bifunctional oxygen electrocatalyst for zinc–air batteries
Source: Royal Society of Chemistry journal article supplement (doi:10.1039/d1se00007a), 2021-01-01
Supplement: d1se00007a1.pdf [file d1se00007a1.pdf]

### Supplementary Information

#### Waste to Wealth: Spent Catalyst as an Efficient and Stable Bifunctional Oxygen Electrocatalyst for Zinc-Air Battery

C. Sathiskumar<sup>a</sup>, Lavanya Meesala<sup>b</sup>, Pramod Kumar<sup>b</sup>, B. Ramachandra Rao<sup>b</sup>,  
Neena S. John<sup>\*a</sup>, and H. S. S. Ramakrishna Matte<sup>\*a</sup>  
[jsneena@cens.res.in](mailto:jsneena@cens.res.in), [matte@cens.res.in](mailto:matte@cens.res.in)

<sup>a</sup>Centre for Nano and Soft Matter Sciences, Jalahalli, Bengaluru -560013, India

<sup>b</sup>HP Green R&D Centre, KIADB Industrial Area, Tarabanahalli, Devanagundi, Hoskote,  
Bengaluru 560067, India

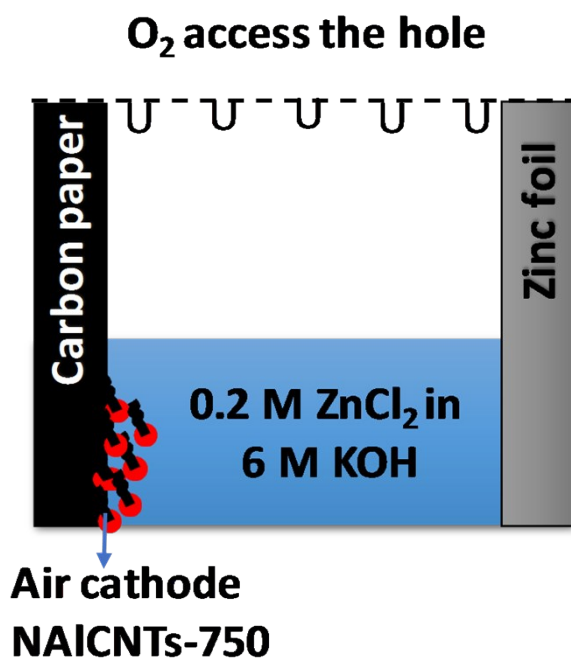

Figure S1. Schematic diagram of Zinc-air battery setup

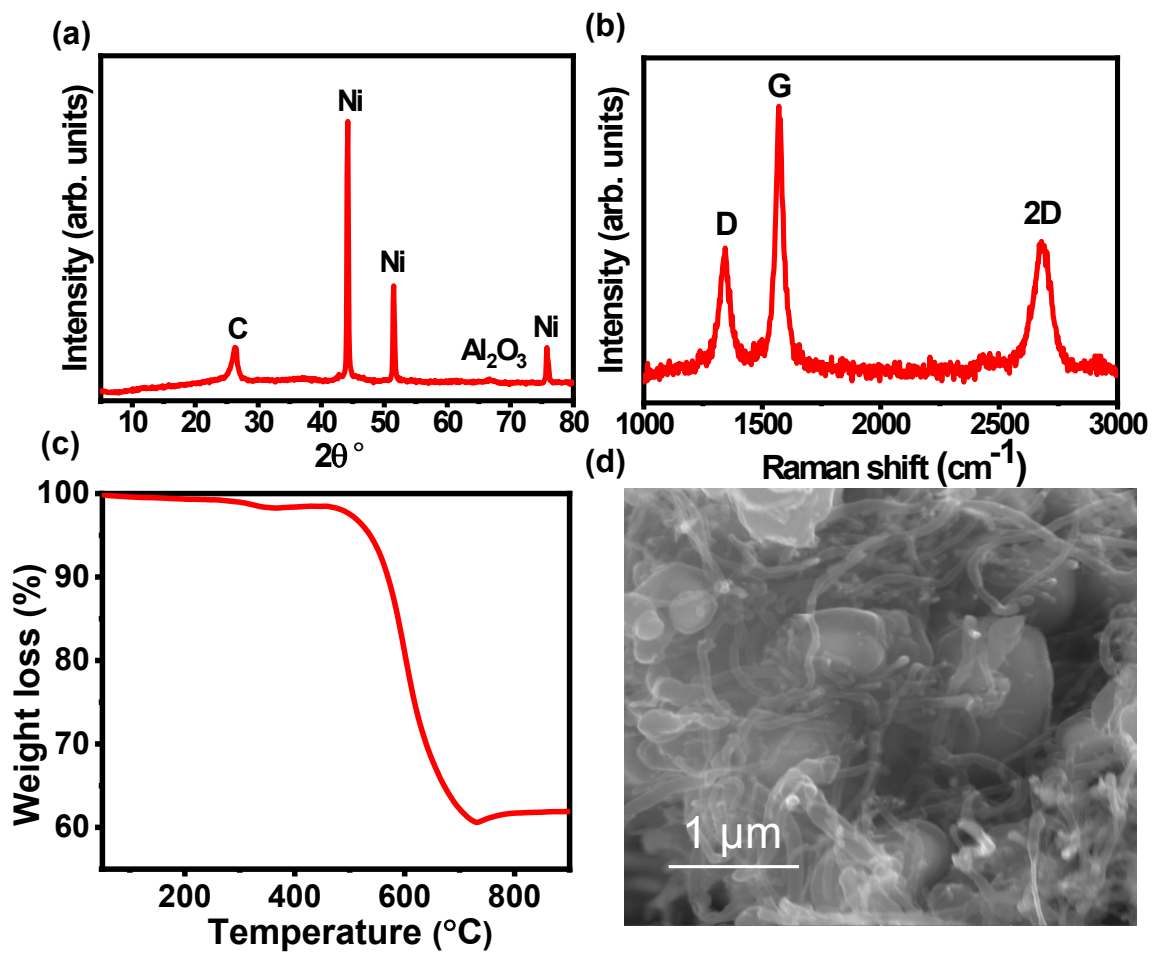

Figure S2. (a) XRD pattern (b) Raman spectra (c) TGA (d) FESEM of NAICNTs-650.

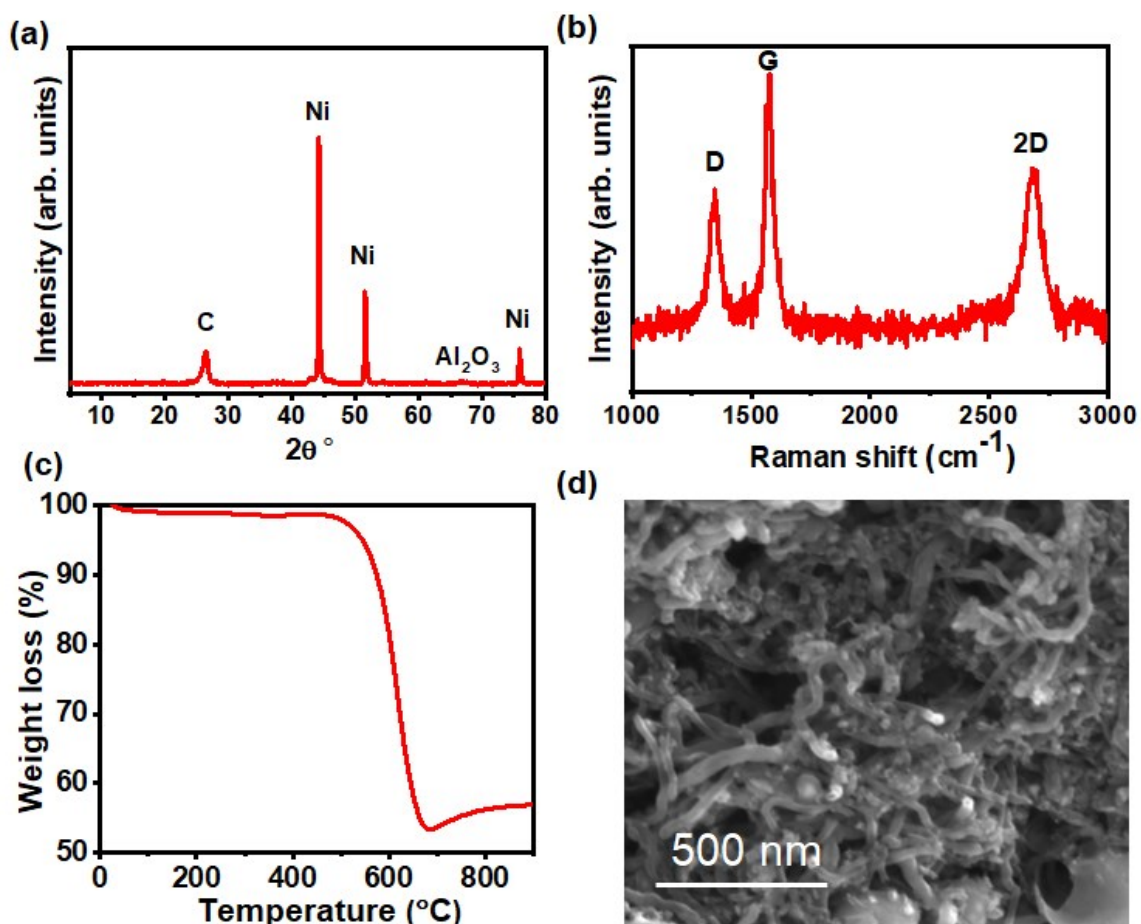

**Figure S3.** (a) XRD pattern (b) Raman spectra (c) TGA (d) FE-SEM of NAICNTs-750/4h.

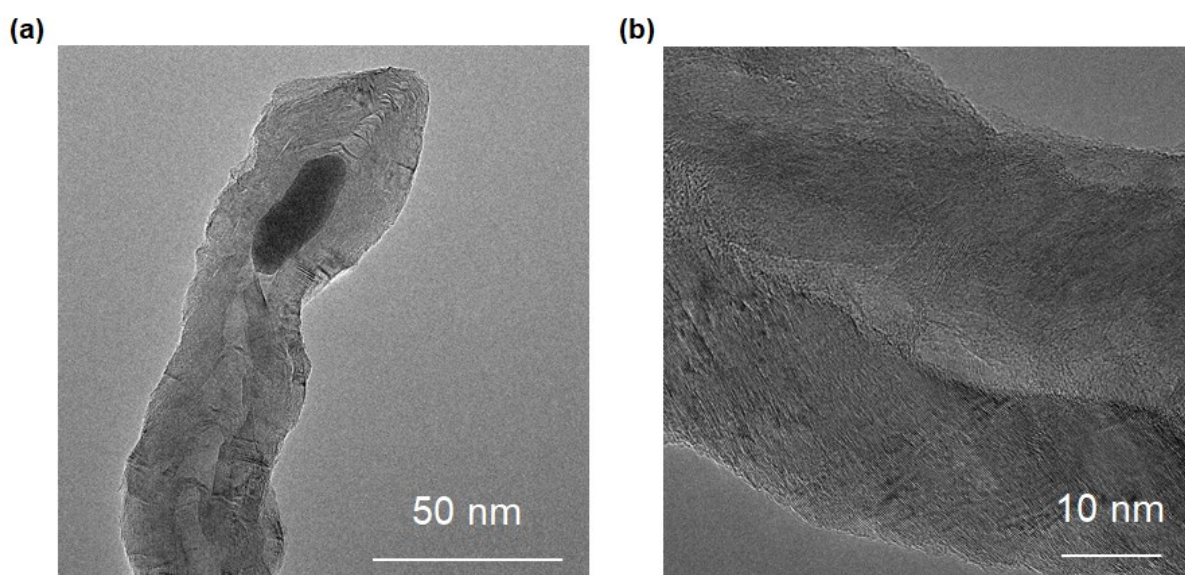

**Figure S4.** HRTEM image of NAICNTs-750.

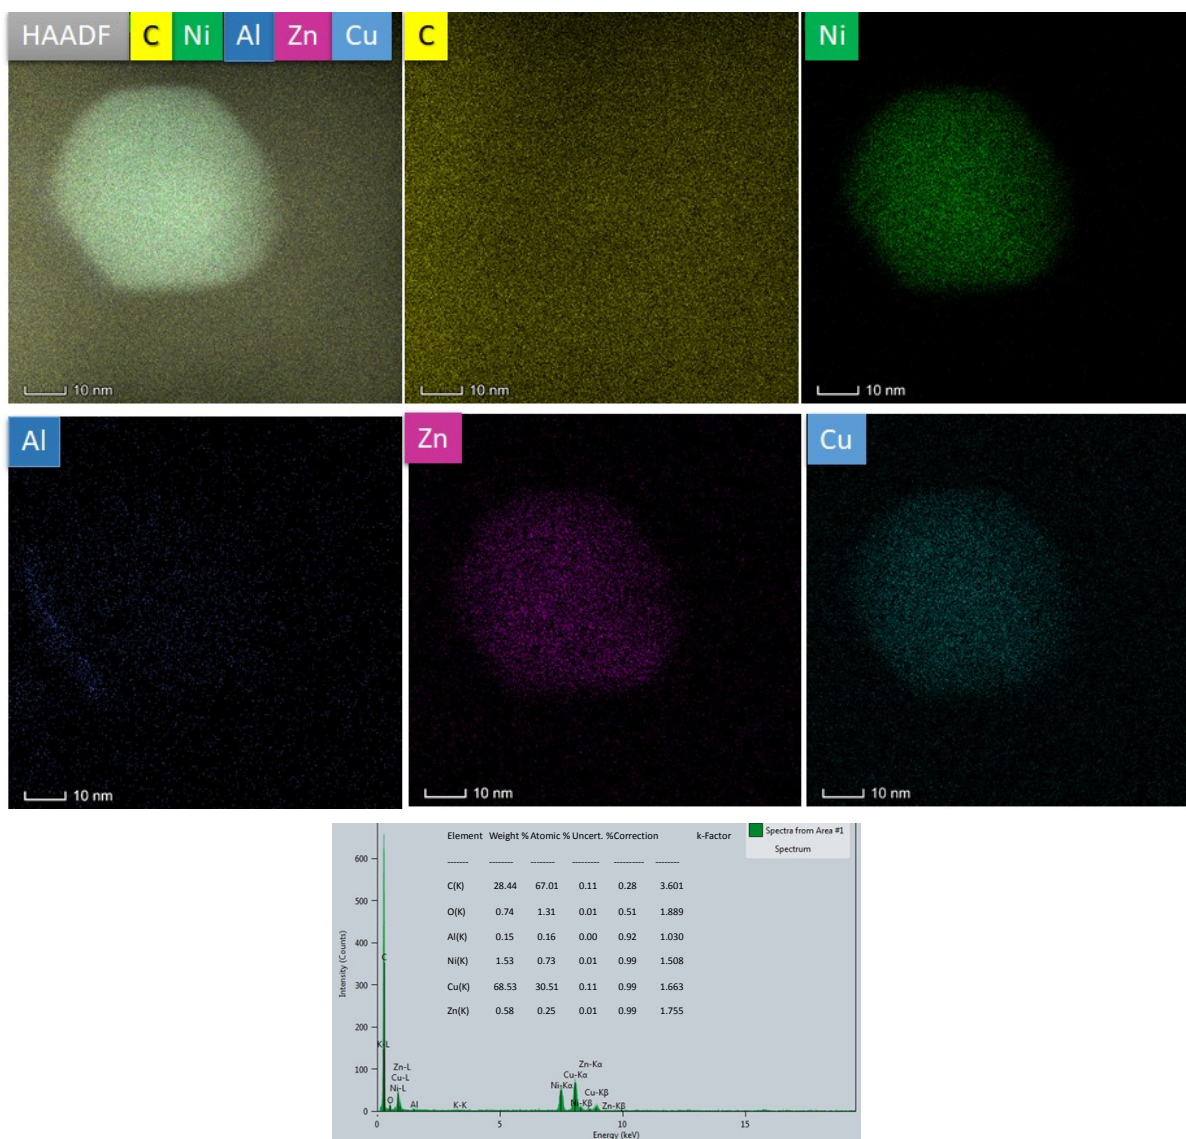

**Figure S5.** EDS elemental mapping of NAICNTs-750 acquired in STEM mode.

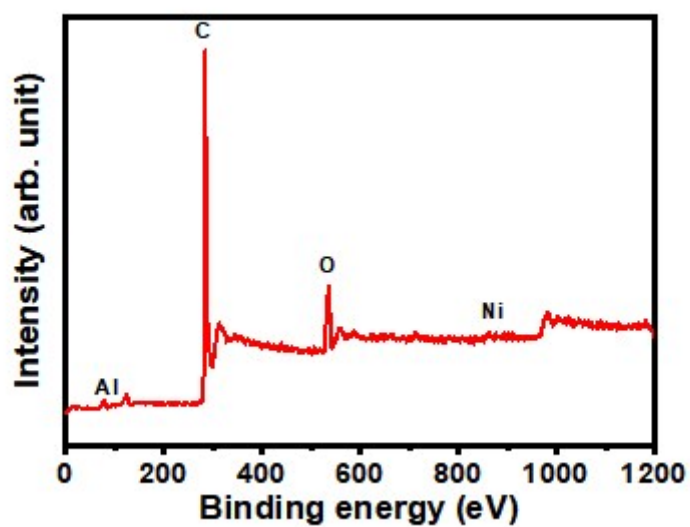

Figure S6. XPS survey spectrum of NAICNTs-750.

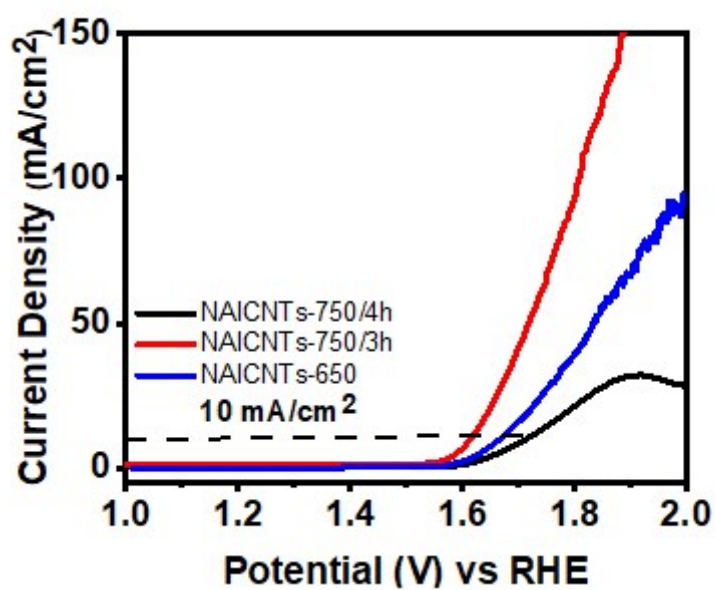

Figure S7. LSV curves of NAICNTs-650, 750 and 750/4h acquired at 5 mV/s scan rate in 1 M KOH solution.

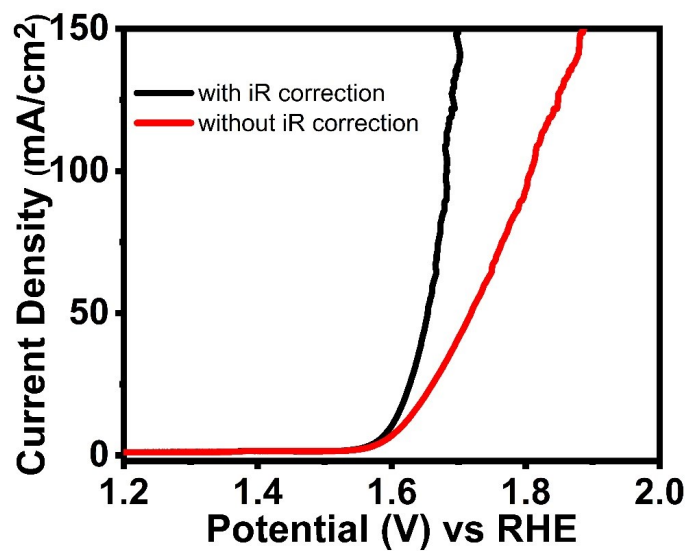

Figure S8. LSV curves of NAICNTs-750 with and without iR correction.

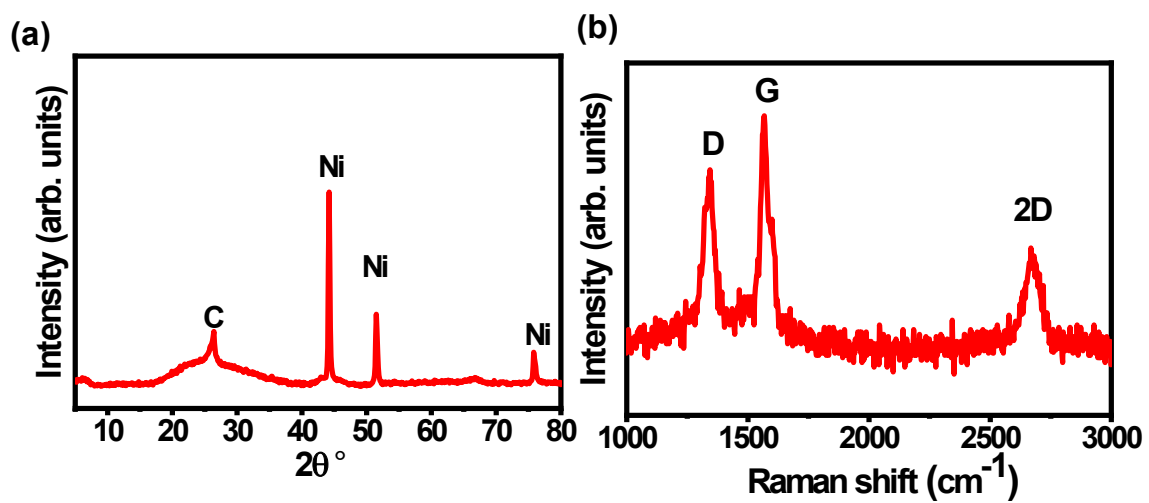

Figure S9. (a) XRD pattern (b) Raman spectra of NAICNTs-750 after stability test.

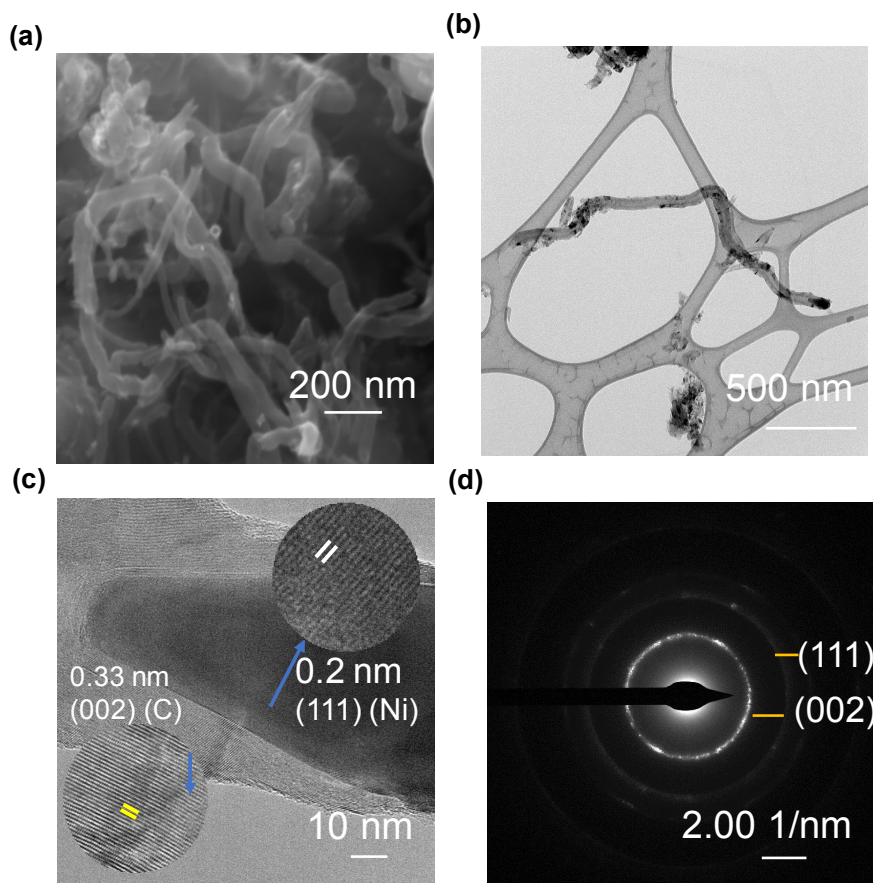

**Figure S10.** (a) FESEM and (b,c) HR-TEM (d) SAED pattern of NAICNTs-750 after stability test.

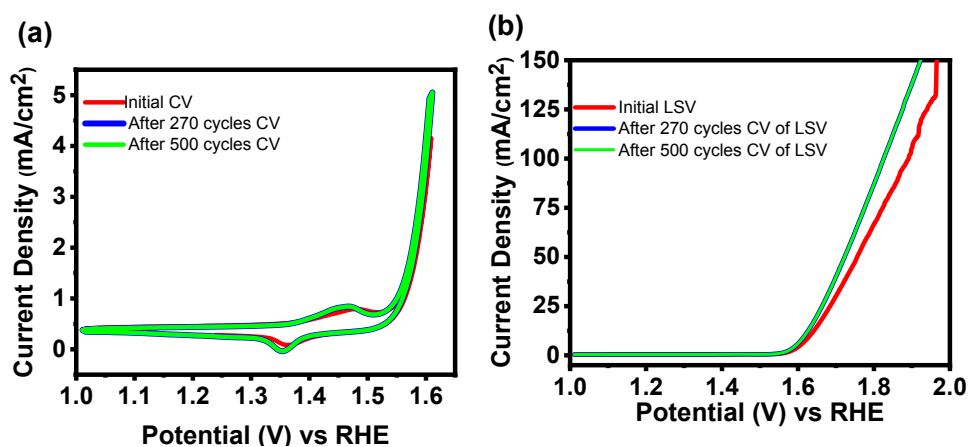

**Figure S11.** CV cycling of NAICNTs-750 in 1 M KOH at 50 mV/s (a) Initial and after 270 and 500 CV cycles (b) The LSV of initial and after 270, 500 CV cycles of NAICNTs-750 acquired in 1 M KOH at a scan rate of 5 mV/s.

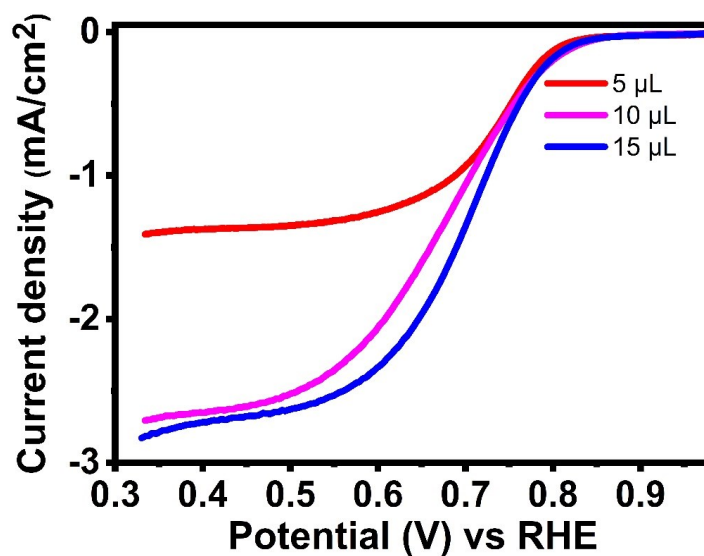

**Figure S12.** LSV of NAICNTs-750 with various loading amounts acquired in 0.1 M KOH acquired at 10 mV/s scan rate and 1600 rpm, electrode rotation speed.

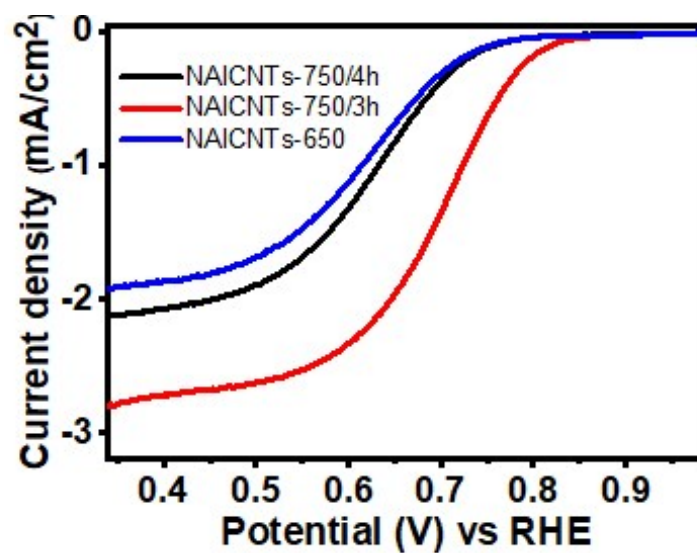

**Figure S13.** LSV curves of NAICNTs-650, 750 and 750/4h with 15 μL loading amount in 0.1 M KOH acquired at 10 mV/s scan rate and 1600 rpm, electrode rotation speed.



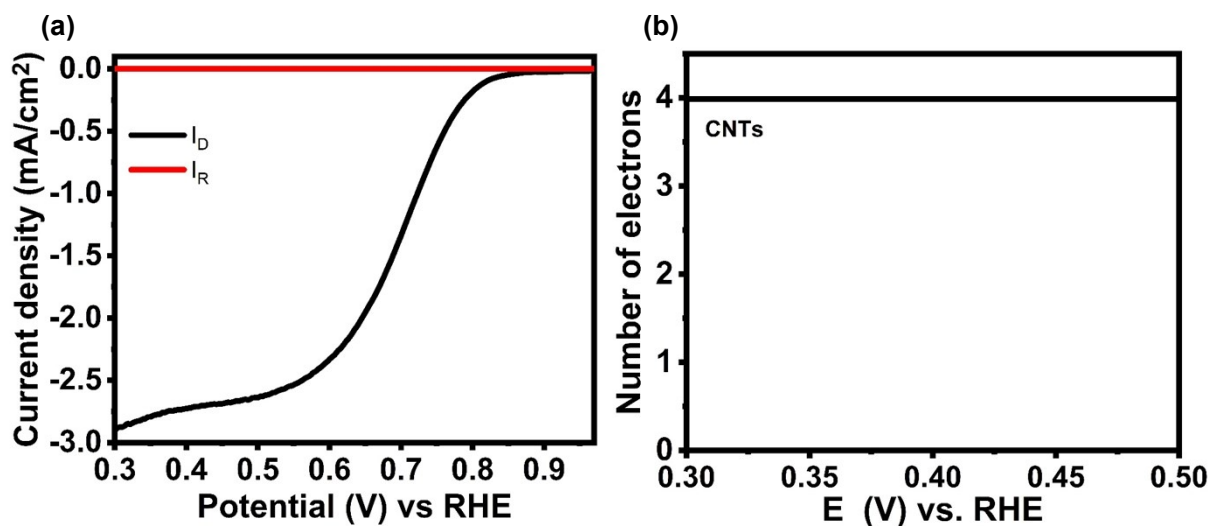

**Figure S14.** a) RRDE polarization curves at 1600 rpm for NAICNTs-750 b) The number of electrons involved in ORR at various applied potentials for purified CNTs.

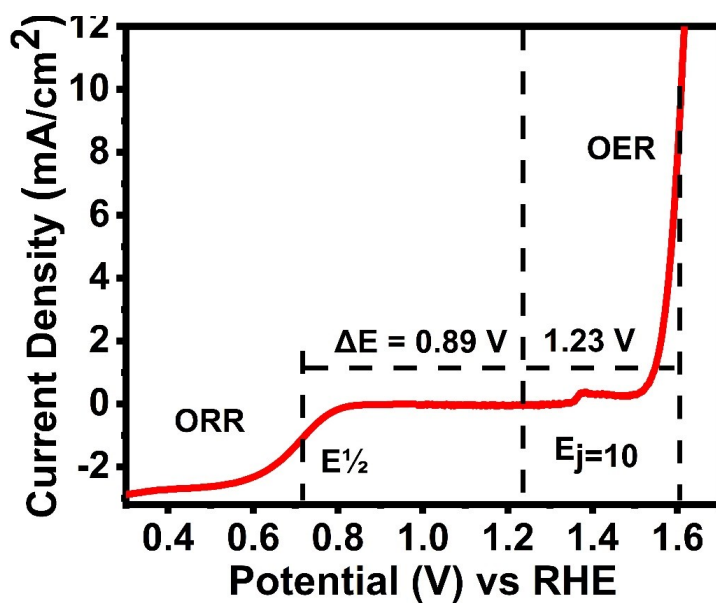

**Figure S15.** Overall oxygen electrocatalyst performance of NAICNTs-750.

**Table S1.** Comparison of OER over potentials and Zn-air battery voltage gap for NAICNTs-750 with related literature.

| <b>S.No.</b> | <b>Electrocatalyst</b>                            | <b>OER over potential (V vs RHE) @ 10 mA/cm<sup>2</sup></b> | <b>Zn-air battery charge and discharge voltage gap (V)</b> | <b>Reference</b> |
|--------------|---------------------------------------------------|-------------------------------------------------------------|------------------------------------------------------------|------------------|
| 1            | NAICNTs-750                                       | 1.6                                                         | 0.87                                                       | Present work     |
| 2            | ZnCo <sub>2</sub> O <sub>4</sub> /N-CNT           | 1.65                                                        | 0.8                                                        | 1                |
| 3            | NiCo <sub>2</sub> O <sub>4</sub>                  | 1.57                                                        | 0.98                                                       | 2                |
| 4            | Co <sub>9</sub> S <sub>8</sub> /N,SDoped Graphene | 1.61                                                        | 0.86                                                       | 3                |
| 5            | Fe@C-NG/NCNTs                                     | 1.68                                                        | 0.89                                                       | 4                |
| 6            | CoFe <sub>2</sub> O <sub>4</sub> /CNTs            | 1.74                                                        | 0.8                                                        | 5                |
| 7            | Co@NCNTs                                          | 1.75                                                        | 1.26                                                       | 6                |
| 8            | FCx-NC/CNTs                                       | 1.59                                                        | 0.71                                                       | 7                |
| 9            | NiCo <sub>2</sub> S <sub>4</sub> /N-CNT           | 1.6                                                         | 0.6                                                        | 8                |
| 10           | Fe <sub>1.2</sub> Co@NC/NCNTs                     | 1.585                                                       | 0.74                                                       | 9                |
| 11           | CoFe@NCNTs                                        | 1.68                                                        | 1.25                                                       | 10               |
| 12           | Co-N,B-CSs                                        | 1.64                                                        | 1.35                                                       | 11               |
| 13           | CNTf-N-170                                        | 1.59                                                        | 0.81                                                       | 12               |
| 14           | CNT arrays/grapheme                               | 1.68                                                        | 0.7                                                        | 13               |

## References

- 1 Z. Q. Liu, H. Cheng, N. Li, T. Y. Ma and Y. Z. Su, *Adv. Mater.*, 2016, **28**, 3777–3784.
- 2 W. Liu, J. Bao, L. Xu, M. Guan, Z. Wang, J. Qiu, Y. Huang, J. Xia, Y. Lei and H. Li, *Appl. Surf. Sci.*, 2019, **478**, 552–559.
- 3 Q. Shao, J. Liu, Q. Wu, Q. Li, H. guo Wang, Y. Li and Q. Duan, *Nano-Micro Lett.*, 2019, **11**, 1–14.
- 4 Q. Wang, Y. Lei, Z. Chen, N. Wu, Y. Wang, B. Wang and Y. Wang, *J. Mater. Chem. A*, 2018, **6**, 516–526.
- 5 N. Xu, J. Qiao, Q. Nie, M. Wang, H. Xu, Y. Wang and X. D. Zhou, *Catal. Today*, 2018, **318**, 144–149.
- 6 Y. Liu, P. Dong, M. Li, H. Wu, C. Zhang, L. Han and L. Han, *Front. Mater.*, 2019, **6**, 1–10.
- 7 X. Xiao, X. Li, G. Yu, J. Wang, G. Yan, Z. Wang and H. Guo, *J. Power Sources*, 2019, **438**, 227019.
- 8 X. Han, X. Wu, C. Zhong, Y. Deng, N. Zhao and W. Hu, *Nano Energy*, 2017, **31**, 541–550.
- 9 S. Li, W. Chen, H. Pan, Y. Cao, Z. Jiang, X. Tian, X. Hao, T. Maiyalagan and Z. J. Jiang, *ACS Sustain. Chem. Eng.*, 2019, **7**, 8530–8541.
- 10 P. Cai, Y. Hong, S. Ci and Z. Wen, *Nanoscale*, 2016, **8**, 20048–20055.
- 11 Y. Guo, P. Yuan, J. Zhang, Y. Hu, I. S. Amiinu, X. Wang, J. Zhou, H. Xia, Z. Song, Q. Xu and S. Mu, *ACS Nano*, 2018, **12**, 1894–1901.
- 12 A. Pendashteh, J. Palma, M. Anderson, J. J. Vilatela and R. Marcilla, *ACS Appl. Energy Mater.*, 2018, **1**, 2434–2439.
- 13 X. Cai, B. Y. Xia, J. Franklin, B. Li, X. Wang, Z. Wang, L. Chen, J. Lin, L. Lai and Z. Shen, *J. Mater. Chem. A*, 2017, **5**, 2488–2495.
